# Supplementary material
Source: Elsevier journal article supplement (https://www.sciencedirect.com/science/article/pii/S2530064420300237)
Supplement: mmc1 [file S2530064420300237:mmc1.pdf]

# Opportunities to close the gap between science and practice for Marine Protected Areas in Brazil

## Supplementary Materials

Morena Mills<sup>1</sup>, Rafael A. Magris<sup>2</sup>, Mariana M. P. B. Fuentes<sup>3</sup>, Roberta Bonaldo<sup>4</sup>, Dannieli F. Herbst<sup>5</sup>, Monique C. S. Lima<sup>6</sup>, Isabela K. G. Kerber<sup>7</sup>, Leopoldo C. Gerhardinger<sup>8</sup>, Rodrigo L. de Moura<sup>9</sup>, Camila Domit<sup>10</sup>, João B. Teixeira<sup>11</sup>, Hudson T. Pinheiro<sup>12</sup>, Gabriel Vianna<sup>13</sup>, Rodrigo Rodrigues de Freitas<sup>14</sup>

<sup>1</sup> Centre for Environmental Policy, Imperial College London, Silwood Park Campus, Buckhurst Road, Ascot, Berkshire, SL5 7PY, United Kingdom. Corresponding author: [m.mills@imperial.ac.uk](mailto:m.mills@imperial.ac.uk)

<sup>2</sup>Chico Mendes Institute for Biodiversity Conservation, Brazilian Ministry of the Environment, Brasilia-DF 70.670-350 Brazil.

<sup>3</sup>Department of Earth, Ocean and Atmospheric Science, Florida State University, Tallahassee, Florida, United States of America.

<sup>4</sup> Grupo de História Natural de Vertebrados, Instituto de Biologia, Universidade Estadual de Campinas, 13083-862, Campinas, SP, Brazil

<sup>5</sup>Universidade Federal de Santa Catarina. Câmpus Trindade, 88010-970 Florianópolis, SC, Brazil.

<sup>6</sup>São Carlos School of Engineering, University of São Paulo, São Carlos, São Paulo, Brazil.

<sup>7</sup>Geosciences Department, Federal University of Santa Catarina, Florianópolis, Santa Catarina, Brazil.

<sup>8</sup>Instituto Oceanográfico, Universidade de São Paulo, 05508-120, São Paulo, SP, Brazil.

<sup>9</sup>Instituto de Biologia and SAGE/COPPE, Universidade Federal do Rio de Janeiro, 21944-970, Rio de Janeiro, RJ, Brazil.

<sup>10</sup>Laboratory of Ecology and Conservation, Centro de Estudos do Mar, Universidade Federal do Paraná, Pontal do Paraná, Paraná, Brazil.

<sup>11</sup>Departamento de Ciências Biológicas, Universidade Estadual de Santa Cruz, Ilhéus, BA CEP 45650-000, Brazil.

<sup>12</sup> Department of Ecology and Evolutionary Biology, University of California Santa Cruz, Santa Cruz, California, United States of America, and California Academy of Sciences, San Francisco, California, United States of America.

<sup>13</sup> Oceana - SIG Quadra 1, Lote 985, sala 251, CEP 70610-410; Brasília, DF, Brazil.

<sup>14</sup> Programa de Pós-Graduação em Ciências Ambientais, Universidade do Sul de Santa Catarina, Tubarão, SC, CEP 88704-900, Brazil.

**Supplementary Table 1.** All MPAs considered in this study and whether a management plan was available.

| <b>Marine Protected Area</b>                                                      | <b>Management plan? (Yes/No)</b> |
|-----------------------------------------------------------------------------------|----------------------------------|
| Área de Proteção Ambiental da Barra do Rio Mamanguape                             | Yes                              |
| Área de Proteção Ambiental de Guaraqueçaba                                        | Yes                              |
| Área de Proteção Ambiental Costa dos Corais                                       | Yes                              |
| Área de Proteção Ambiental da Baleia Franca                                       | No                               |
| Área de Proteção Ambiental da Costa das Algas                                     | No                               |
| Área De Proteção Ambiental De Cananéia-Iguapé-Peruíbe                             | Yes                              |
| Área de Proteção Ambiental de Guapimirim                                          | Yes                              |
| Área de Proteção Ambiental de Piaçabuçu                                           | Yes                              |
| Área de Proteção Ambiental do Anhatomirim                                         | Yes                              |
| Área de Proteção Ambiental do Delta do Parnaíba                                   | Yes                              |
| Área de Proteção Ambiental Fernando de Noronha                                    | Yes                              |
| Área de Proteção Ambiental Arquipélago de São Pedro e São Paulo                   | No                               |
| Área de Proteção Ambiental Arquipelago de Trindade e Martim Vaz                   | No                               |
| Área de Relevante Interesse Ecológico Ilha Ameixal                                | No                               |
| Área de Relevante Interesse Ecológico Ilhas da Queimada Pequena e Queimada Grande | No                               |
| Área de Relevante Interesse Ecológico Manguezais da Foz do Rio Mamanguape         | No                               |
| Área de Proteção Ambiental de Cairuçu                                             | Yes                              |
| Estação Ecológica de Guanabara                                                    | Yes                              |
| Estação Ecológica de Guaraqueçaba                                                 | No                               |
| Estação Ecológica de Maracá Jipioca                                               | No                               |
| Estação Ecológica de Tamoios                                                      | Yes                              |
| Estação Ecológica do Taim                                                         | No                               |
| Estação Ecológica dos Carijós                                                     | Yes                              |
| Estação Ecológica dos Tupiniquins                                                 | Yes                              |
| Estação Ecológica Tupinambás                                                      | No                               |
| Monumento Natural do Arquipélago das Ilhas Cagarras                               | No                               |
| Monumento Natural do Arquipélago de São Pedro e São Paulo                         | No                               |
| Monumento Natural do Arquipelago de Trindade e Martim Vaz                         | No                               |
| Parque Nacional de Saint-Hilaire/Lange                                            | No                               |
| Parque Nacional da Lagoa do Peixe                                                 | Yes                              |
| Parque Nacional da Restinga de Jurubatiba                                         | Yes                              |
| Parque Nacional do Cabo Orange                                                    | Yes                              |
| Parque Nacional do Jericoacoara                                                   | Yes                              |
| Parque Nacional do Superagui                                                      | No                               |
| Parque Nacional dos Lençóis Maranhenses                                           | Yes                              |
| Parque Nacional Marinho das Ilhas dos Currais                                     | No                               |
| Parque Nacional Marinho de Fernando de Noronha                                    | Yes                              |
| Parque Nacional Marinhos dos Abrolhos                                             | Yes                              |
| Refugio da Vida Silvestre de Santa Cruz                                           | No                               |

|                                                 |     |
|-------------------------------------------------|-----|
| Refugio da Vida Silvestre Ilha dos Lobos        | No  |
| Reserva Biológica Atol das Rocas                | Yes |
| Reserva Biológica de Comboios                   | Yes |
| Reserva Biológica de Santa Isabel               | No  |
| Reserva Biológica do Lago Piratuba              | No  |
| Reserva Biológica Marinha do Arvoredo           | Yes |
| Reserva Extrativista Acaú-Goiana                | No  |
| Reserva Extrativista Chocoaré-Mato Grosso       | No  |
| Reserva Extrativista Corumbau                   | No  |
| Reserva Extrativista de Canavieiras             | No  |
| Reserva Extrativista de Cassurubá               | No  |
| Reserva Extrativista de Cururupu                | No  |
| Reserva Extrativista de São João da Ponta       | No  |
| Reserva Extrativista do Batoque                 | No  |
| Reserva Extrativista Mãe Grande de Curuçá       | No  |
| Reserva Extrativista Mandira                    | Yes |
| Reserva Extrativista Maracanã                   | No  |
| Reserva Extrativista Marinha Araí Peroba        | No  |
| Reserva Extrativista Marinha de Caeté-Taperaçu  | Yes |
| Reserva Extrativista Marinha de Gurupi-Piriá    | No  |
| Reserva Extrativista Marinha de Soure           | No  |
| Reserva Extrativista Marinha de Tracuateua      | No  |
| Reserva Extrativista Marinha do Arraial do Cabo | No  |
| Reserva Extrativista Marinha Pirajubaé          | No  |
| Reserva Extrativista Prainha do Canto Verde     | No  |
| Reserva Extrativista Delta do Parnaíba          | No  |
| Reserva Extrativista Marinha Cuinarana          | No  |
| Reserva Extrativista Marinha da Baía de Iguape  | No  |
| Reserva Extrativista Marinha da Lagoa do Jequiá | No  |
| Reserva Extrativista Marinha Mestre Lucindo     | No  |
| Reserva Extrativista Marinha Mocapajuba         | No  |

**Supplementary Table 2.** Data collected for the MPAs based on the Ministry of the Environment website and the management plans available.

|                                                                                                                                                                                 |
|---------------------------------------------------------------------------------------------------------------------------------------------------------------------------------|
| <b>INFORMATION COLLECTED FOR EVERY MPA</b>                                                                                                                                      |
| Marine Protected Area name                                                                                                                                                      |
| Date Implemented                                                                                                                                                                |
| What jurisdictional scale is the MPA?                                                                                                                                           |
| List relevant state or states                                                                                                                                                   |
| Area of MPA                                                                                                                                                                     |
| Management plan available (Yes/No)                                                                                                                                              |
| <b>INFORMATION COLLECTED WITHIN EVERY EXISTING MANAGEMENT PLAN</b>                                                                                                              |
| Date management plan was published                                                                                                                                              |
| Which organisation led the development of the management plan?                                                                                                                  |
| Was the management plan implemented?                                                                                                                                            |
| Date of implementation?                                                                                                                                                         |
| Are the factors driving the creation of the management plan stated? (e.g. emerging threat, political opportunity) (Yes /No)                                                     |
| If yes, what are the factors driving the creation of the management plan? (e.g. emerging threat, political opportunity)                                                         |
| Are the costs involved in the development of the management plan stated? (Yes/No)                                                                                               |
| If yes, what are they?                                                                                                                                                          |
| Was a timeframe provided? (Yes/No)                                                                                                                                              |
| Were the key stakeholders identified?                                                                                                                                           |
| <b>Planning region</b>                                                                                                                                                          |
| What criteria are used to define the planning region boundaries?                                                                                                                |
| Are land-based threats considered in the decision about the planning region boundaries? (Yes/No)                                                                                |
| If yes, briefly describe how the land-sea approach was used to define the planning boundaries (e.g. main elements or criteria used to define the limits of the planning region) |
| Does the MPA have a buffer zone? (Yes/No)                                                                                                                                       |
| If yes, what defines the buffer zone?                                                                                                                                           |
| Have there been any changes to the activities that occur within the buffer zone?                                                                                                |
| What realms does the MPA cover? (terrestrial, marine, freshwater)                                                                                                               |
| Are there indigenous areas within planning region? (Yes/No)                                                                                                                     |
| <b>Goals, objectives and data</b>                                                                                                                                               |
| Stated goals of the MPA                                                                                                                                                         |
| Goals of MPA include (social/ecological/social and ecological)                                                                                                                  |
| Have the goals been converted to quantitative objectives? (Yes/No)                                                                                                              |
| If yes, please explain which ones and what they are?                                                                                                                            |
| If no, are these qualitative objectives (e.g. statements of preferences which are more specific than the general goals)?                                                        |
| If yes, please describe what they are?                                                                                                                                          |
| Does the plan have target species or ecosystems? (Yes/No)                                                                                                                       |

|                                                                                                                                                      |
|------------------------------------------------------------------------------------------------------------------------------------------------------|
| If yes, what are they?                                                                                                                               |
| Are there quantitative objectives linked to the target species or ecosystem? (Yes/No)                                                                |
| If yes, please describe                                                                                                                              |
| If yes, how is the target measured/represented?                                                                                                      |
| Does the plan target ecological processes? (Yes/No)                                                                                                  |
| If yes, which ecological process?                                                                                                                    |
| If yes, how is/are the ecological process/processes represented?                                                                                     |
| Are threats considered in the management plan? (Yes/No)                                                                                              |
| If yes, which ones?                                                                                                                                  |
| If yes, what information was used to represent threats?                                                                                              |
| Are costs considered in the management plan? (Yes/No)                                                                                                |
| If yes, which ones?                                                                                                                                  |
| If yes, what information was used to represent costs?                                                                                                |
| Are opportunities considered in the development of the management plan? (Yes/No)                                                                     |
| If yes, which ones?                                                                                                                                  |
| If yes, what information was used to represent opportunities?                                                                                        |
| <b>Management zones</b>                                                                                                                              |
| Does the management plan consider multiple zones? (Yes/No)                                                                                           |
| If yes, what are they?                                                                                                                               |
| Does the placement of the management zones consider land-based threats?                                                                              |
| Does the placement of the management zones change over time (temporally dynamic)? If so, please explain how.                                         |
| <b>Stakeholder involvement and knowledge/data integration</b>                                                                                        |
| Were stakeholders involved in the planning process? (Yes/No)                                                                                         |
| If yes, at which stages of Pressey and Bottrill (2008) were they involved?                                                                           |
| How were stakeholders involved (informed, provided information, active participation [e.g. involved in workshops], participated in decision-making)? |
| List stakeholder groups considered                                                                                                                   |
| Was there a planning guide/framework used to support the planning process? (Yes/No)                                                                  |
| If yes, what was the guide/framework used to support planning process?                                                                               |
| Identify all the methods and techniques used in the project to integrate and analyse the information and to construct the final products?            |
| <b>Implementation and adaptive management</b>                                                                                                        |
| Indicate the level of implementation of the plan                                                                                                     |
| Were mainstreaming activities undertaken to communicate the plans results?                                                                           |
| Indicate if the plan has been revised to produce and updated version                                                                                 |
| Is adaptation of the management plan scheduled? (Yes/No)                                                                                             |
| Is there monitoring of the plans objectives? (Yes/No)                                                                                                |
| If yes, what is monitored and how?                                                                                                                   |
| Which types of conservation actions have been proposed/done to improve alignment with proposed objectives (research priorities, enforcement needs)?  |
| Does the plan mention the need to evaluate management?                                                                                               |

|                                                          |
|----------------------------------------------------------|
| Are there strategies for management evaluation? (Yes/No) |
| If yes, what are they?                                   |

**Supplementary Table 3.** Inflation rates correction based on the Banco Central do Brazil calculator to 03/2020 (IGP-M index)

| <b>Marine Protected Area</b>                   | <b>Date management plan published</b> | <b>Inflation rate correction</b> |
|------------------------------------------------|---------------------------------------|----------------------------------|
| Área de Proteção Ambiental Costa dos Corais    | 12/01/12                              | 1.63                             |
| Área de Proteção Ambiental de Piaçabuçu        | 05/01/10                              | 1.91                             |
| Área de Proteção Ambiental Fernando de Noronha | 01/01/05                              | 2.33                             |
| Estação Ecológica de Tamoios                   | 01/01/06                              | 2.31                             |
| Estação Ecológica dos Tupiniquins              | 01/01/08                              | 2.06                             |
| Parque Nacional da Lagoa do Peixe              | 01/01/99                              | 5.21                             |
| Parque Nacional dos Lençóis Maranhenses        | 25/06/95                              | 6.76                             |
| Reserva Biológica Atol das Rocas               | 01/01/07                              | 2.22                             |
| Reserva Biológica de Comboios                  | 07/01/97                              | 5.71                             |
| Reserva Biológica Marinha do Arvoredo          | 07/01/04                              | 2.62                             |
